# Robust expansion of phylogeny for fast-growing genome sequence data

## Authors

Yongtao Ye<sup>1,2\*</sup>, Marcus H. Shum<sup>1,2\*</sup>, Joseph L. Tsui<sup>1,2\*</sup>, Guangchuang Yu<sup>3\*</sup>, David K. Smith<sup>1</sup>,  
Huachen Zhu<sup>1,2,4,5</sup>, Joseph T. Wu<sup>1,2</sup>, Yi Guan<sup>1,2,4,5</sup>, Tommy T. Lam<sup>1,2,4,5,6</sup>

## Affiliations

<sup>1</sup> State Key Laboratory of Emerging Infectious Diseases, School of Public Health, The University of Hong Kong, Hong Kong SAR, P. R. China

<sup>2</sup> Laboratory of Data Discovery for Health Limited, 19W Hong Kong Science & Technology Parks, Hong Kong SAR, P. R. China

<sup>3</sup> Department of Bioinformatics, School of Basic Medical Sciences, Southern Medical University, Guangzhou, Guangdong, China

<sup>4</sup> Guangdong-Hongkong Joint Laboratory of Emerging Infectious Diseases, Joint Institute of Virology (Shantou University/The University of Hong Kong), Shantou, Guangdong, 515063, P. R. China.

<sup>5</sup> EKI (Gewuzhikang) Pathogen Research Institute, Futian District, Shenzhen City, Guangdong, 518045, P. R. China.

<sup>6</sup> Centre for Immunology & Infection Limited, 17W Hong Kong Science & Technology Parks, Hong Kong SAR, P. R. China

\* These authors contributed equally to the research.

# Correspondence: [ttylam@hku.hk](mailto:ttylam@hku.hk)

26 **Abstract**

27

28 Massive sequencing of SARS-CoV-2 genomes has led to a great demand for adding new samples  
29 to a reference phylogeny instead of building the tree from scratch. To address such challenge, we  
30 proposed an algorithm ‘TIPars’ by integrating parsimony analysis with pre-computed ancestral  
31 sequences. Compared to four state-of-the-art methods on four benchmark datasets (SARS-CoV-2,  
32 Influenza virus, Newcastle disease virus and 16S rRNA genes), TIPars achieved the best  
33 performance in most tests. It took only 21 seconds to insert 100 SARS-CoV-2 genomes to a 100k-  
34 taxa reference tree using near 1.4 gigabytes of memory. Its efficient and accurate phylogenetic  
35 placements and incrementation for phylogenies with highly similar and divergent sequences  
36 suggest that it will be useful in a wide range of studies including pathogen molecular  
37 epidemiology, microbiome diversity and systematics.

38

## 39 **Introduction**

40

41 Next generation sequencing (NGS) technologies enable large-scale exploration of diversity and  
42 monitoring temporal evolution of organisms, which often involve generating and analyzing large  
43 numbers of sequences from new organisms on an ongoing basis. For instance, over 5 million of  
44 SARS-CoV-2 genomes have been sequenced within two years of the pandemic (Shu &  
45 McCauley, 2017), largely facilitating transmission tracking and disease control. Conventional  
46 methods of phylogeny inference from scratch such as those implemented in IQ-TREE2 (Minh et  
47 al., 2020) and FastTree2 (Price, Dehal, & Arkin, 2010) could hardly cope with such rapidly  
48 growing huge sequence datasets. Therefore, determining the evolutionary position of new  
49 sequences as they become available by placing or inserting them into the reference tree becomes a  
50 more efficient alternative. Such ‘phylogenetic placement’ has been useful for taxonomic  
51 classification, while accumulative addition of sequences (incrementing the phylogeny as a result)  
52 allow efficient update of the growing phylogeny in a global context.

53

54 Previously published methods such as PhyClass (Filipski, Tamura, Billing-Ross, Murillo, &  
55 Kumar, 2015), EPA-ng (Barbera et al., 2019) and pplacer (Matsen, Kodner, & Armbrust, 2010)  
56 utilize minimum evolution or maximum likelihood criteria to infer the evolutionary position of  
57 the query sequence and place it directly onto a pre-built phylogeny. These algorithms require  
58 relatively large computer memory or long runtime which makes massive sequence insertion  
59 difficult. Recently, in respect of tracking the diversity of the large amount of SARS-CoV-2 virus  
60 genomes, UShER (Yatish Turakhia et al., 2021) was developed to tackle this problem by  
61 calculating the ‘branch parsimony score’ to search for positions of taxa placement only based on  
62 sequence mutations to a particular reference. It is extremely fast as compared to the other existing  
63 programs. Although the performance of UShER on the SARS-CoV-2 genomes is promising, the

64 placement performance for genome sequences with greater divergence is not well studied.

65

66 We hereby introduce a new approach TIPars, which inserts sequences into a reference phylogeny  
67 based on parsimony criterion with the aids of a full multiple sequence alignment of taxa and pre-  
68 computed ancestral sequences. The ancestral sequences are useful and efficient in assisting the  
69 search of the best placed position because these ancestral sequences often contain rich  
70 information in the evolution context of a phylogenetic tree (Loytynoja, Vilella, & Goldman,  
71 2012). Recent ancestral sequence reconstruction methods such as PastML (Ishikawa, Zhukova,  
72 Iwasaki, & Gascuel, 2019) and RASP4 (Y. Yu, Blair, & He, 2020) have improved speed and  
73 accuracy to become feasible in the huge SARS-CoV-2 phylogeny. TIPars searches the position  
74 for insertion by calculating the triplet-based minimal substitution score for the query sequence on  
75 all branches (Fig. 1A). To compare the performances of different phylogenetic  
76 placement/insertion methods including TIPars, UShER, EPA-ng, IQ-TREE2 and PAGAN2  
77 (Loytynoja et al., 2012), we applied them on four benchmark datasets (SARS-CoV-2, Influenza  
78 virus, Newcastle disease virus and 16S rRNA genes). The first test is single taxon placement. We  
79 pruned one taxon from a given phylogenetic tree and applied the methods to place it back. The  
80 second is multiple taxa insertion in which a set of taxa was removed and sequentially inserted  
81 back. We compared the topology and log likelihood for the trees before pruning and after  
82 reinsertion. Our evaluation tests aimed to assess the robustness of the methods on both highly  
83 similar sequences and divergent sequences, and whether the phylogenetic tree could be efficiently  
84 updated with new sequences that are continuously generated.

85

## 86 **Results**

87

### 88 **Computational performance of TIPars and other methods**

89 A number of approaches have been proposed for phylogenetic placement or insertion, but dealing  
90 with the vast number of SARS-CoV-2 genome sequences has rendered most of these methods  
91 impractical or computationally prohibitive. Based on a reference SARS-CoV-2 phylogenetic tree  
92 (SARS2-100k) generated from 96,020 unmasked SARS-CoV-2 sequences of high quality (details  
93 in Methodology), we evaluated our proposed program TIPars with UShER, EPA-ng, IQ-TREE2  
94 and PAGAN2 by sequentially inserting 100 new sequence samples. Only TIPars and UShER  
95 were practicable in terms of running time and memory usage. PAGAN2 were not able to  
96 complete the insertion within 96 hours and hence no data was available. Although IQ-TREE2  
97 used a lower peak memory than EPA-ng, the running time was the highest among all programs. In  
98 contrast, EPA-ng achieved a faster running time than IQ-TREE2 but the peak memory usage was  
99 around 1 terabyte (TB) which would not be practicable for general users. As for TIPars, it took  
100 only 21 seconds (excluding the input loading time) on a 64-cores server and required about 1.4  
101 gigabytes (GB) peak memory usage (Table 1). Another computational performance comparison  
102 on smaller dataset with 800 bacterial 16S rRNA sequences (16S) can be checked in table S1 in  
103 which PAGAN2 was runnable. Overall, in the SARS2-100k phylogenetic tree, TIPars ran 10-300  
104 folds faster than EPA-ng and PAGAN2 with 98.5% to 99.9% less memory used, an efficiency  
105 that is comparable to that of the leading program UShER.

106

### 107 **Single taxon placement**

108

109 Adding a single sequence sample (query) into a reference tree is useful to obtain the phylogenetic  
110 placement of the new data, and can be the basic step for expanding the phylogeny with new  
111 sequences. We tested TIPars, UShER and EPA-ng on four datasets, including the SARS-CoV-2  
112 genomes (SARS2-100k), 16S ribosomal RNA genes (16S), hemagglutinin genes of human  
113 seasonal influenza A viruses (H3N2), and Newcastle disease virus genomes (NDV) where the

114 average pairwise genetic distances (substitutions per site) of SARS2-100k and H3N2 are less than  
115 0.04 (similar sequences) while those of 16S and NDV are greater than 0.12 (divergent sequences)  
116 (details in Methodology; table S2). For the SARS2-100k dataset, EPA-ng was not applied due to  
117 impractically large memory requirement and long runtime.

118

119 Based on the postorder traversal, between every 10 taxa we selected one sequence from the  
120 SARS2-100k sequence alignment resulting in 9,602 sequences, i.e., 10% of the total taxa in the  
121 tree. These selected sequences were individually removed from the reference tree and multiple  
122 sequence alignment (MSA) one at a time and used as the query sample for single taxon  
123 placement. In datasets of 16S, H3N2 and NDV, all taxa were removed individually and used for  
124 the placement test.

125

126 To evaluate the accuracy of each single taxon placement, we calculated the Robinson-Foulds (RF)  
127 distance (Robinson & Foulds, 1981) between the reference tree before the taxon removal and the  
128 resulting tree after the placement using corresponding programs. An RF distance measures the  
129 topological clustering difference between two trees. A zero RF distance indicates that the two  
130 trees are topologically identical, and hence the single taxon placement position is exactly the same  
131 as the original position, i.e. a true positive.

132

133 With the aid of ancestral information and MSA of full sequences, TIPars performed accurately on  
134 phylogenies made of highly similar (SARS2-100k and H3N2) and divergent (16S and NDV)  
135 sequences (Fig. 1B). However, a drop in accuracy on more divergent sequences was observed  
136 from UShER, perhaps because UShER was only based on the sequence mutations to a particular  
137 reference sequence as input, which may lose the insertion information (Yatish Turakhia et al.,  
138 2021). In addition, we noted that due to the massive sequencing of SARS-CoV-2 by different

139 research groups, sequencing quality varies and ambiguity bases often occur in the consensus  
140 genome sequence data, which could affect the placement accuracy. To account for ambiguity data  
141 in sequencing, we used a specific substitution scoring table based on the IUPAC nucleotide  
142 ambiguity codes (table S3) for the taxon placement and insertion process (details in  
143 Methodology), which achieved a robust performance in sequences of different qualities.

144  
145 Notably, when searching through the whole phylogeny for the best position to place a taxon, there  
146 may be cases where multiple branches achieve equal minimum substitution scores, and thus the  
147 placement will be uncertain. As demonstrated in Fig. 1C, TIPars produced the least number of  
148 multiple ambiguously optimal placements in all testing datasets. For example, TIPars generated  
149 23% fewer multiple placements than UShER in the SARS2-100k dataset.

150  
151 A possible reason for the relatively poor performance of EPA-ng could be that RF distance may  
152 not be a reliable metric to compare binary trees derived from the phylogeny with polytomy  
153 because there is a very skewed distribution of RF distance when comparing two random binary  
154 trees (Bryant & Steel, 2009; Lin, Rajan, & Moret, 2012; Moon & Eulenstein, 2019). It is notable  
155 that EPA-ng only processes binary trees. To address this issue, a relaxed criterion for true positive  
156 was applied based on whether there are common sister taxa for the removed and re-placed single  
157 taxon, as previously used (Yatish Turakhia et al., 2021). With the adjusted true positive  
158 measurement, TIPars achieved the highest accuracy in all datasets (fig. S1). While the accuracy of  
159 EPA-ng was substantially improved, it was still the lowest among the three tested programs.

160  
161 To assess the practicability for extremely large phylogenies, we applied TIPars and UShER in  
162 single taxon placement test over the global SARS-CoV-2 phylogenetic tree with 659,885 masked  
163 genome sequences (SARS2-660k) downloaded from the Global Initiative on Sharing All

164 Influenza Database (GISAID) (Shu & McCauley, 2017) on the 6th September 2021. A total of  
165 65,989 sequences (10% of the total taxa in the tree) were removed and re-inserted individually.  
166 Cumulative proportion of single taxon placement result with different RF distance cutoff was  
167 shown in Fig. 1D. TIPars produced trees with significantly higher topological similarity to the  
168 reference tree with a median RF distance of 0.5 and mean of 5.8 (99% confidence interval (CI) =  
169 [5.5-6.1]) as compared to UShER (median RF distance is 3.0 and mean is 31.2 (99% CI = [30.0-  
170 32.4])) at 99% significance level ( $p$ -value  $< 10^{-10}$ ).

171

## 172 **Multiple taxa insertion**

173

174 Multiple taxa insertion was an alternative method in determining the phylogenetic position of new  
175 sequences over conventional complete phylogeny construction from scratch. TIPars and other  
176 three programs (IQ-TREE2, PAGAN2 and UShER) were applied on the four datasets to conduct a  
177 comprehensive evaluation of performance.

178

179 In the SARS2-100k dataset, we performed multiple taxa insertion for 100 sets of  $10^2$  and  $10^3$   
180 randomly selected sequences (an example is shown in Fig. 2A) (random100 and random1000)  
181 and 100 sets of  $10^2$  and  $10^3$  successively selected sequences (i.e., a set of successive taxa  
182 following the tree postorder traversal; an example is shown in Fig. 2B) (successive100 and  
183 successive1000). In the 16S, H3N2 and NDV datasets, 100 sets of 50 sequences were randomly  
184 selected. The selected sequences are pruned from the corresponding reference tree and become  
185 multiple taxa to be reinserted for each testing set.

186

187 RF distance and tree log-likelihood (LL) were used to evaluate the performance of the multiple  
188 sequence insertion. To evaluate the topology accuracy, the resulting tree produced by the four



189 programs were compared to the original reference tree (leaf taxa unpruned) to obtain the RF  
190 distance. At the same time, Gamma20 log-likelihoods of the reference tree and the resulting tree  
191 after optimizing the branch length were also computed using FastTree2 (double-precision version)  
192 and their differences were used for evaluation.

193

194 For the random100 and random1000 datasets, only analyses using TIPars and UShER were able  
195 to complete within a reasonable computation time, hence no result from IQ-TREE2 and PAGAN2  
196 was present. The resulting trees from multiple taxa insertion using TIPars had a significantly  
197 smaller RF distance than those generated using UShER (Fig. 3A). In addition, the log-likelihood  
198 of the resulting trees from TIPars was significantly higher than that of UShER (Fig. 3B).

199 Moreover, TIPars resulting trees tended to be very close to the reference tree with smaller log-  
200 likelihood differences (fig. S2, A and B). A demonstration of the taxa-insertion was illustrated in  
201 Fig. 2A by adding 1000 samples. We observed there were more crossing lines from reference tree  
202 to UShER resulting tree indicating more misplaced insertions.

203

204 As to 16S, H3N2 and NDV datasets, TIPars mostly outperformed IQ-TREE2, PAGAN2 and  
205 UShER with a significantly lower RF distance and a higher log-likelihood of resulting trees (Fig.  
206 3, E to H; fig. S3). In the H3N2 dataset, there was no significant tree log-likelihood difference  
207 between TIPars and UShER (Fig. 3G), and in NDV dataset, TIPars performed better than IQ-  
208 TREE2 with higher mean log-likelihood but without statistical significance (Fig. 3H). The  
209 demonstrations of the taxa-insertion result were visualized in Fig. 2C where UShER, IQ-TREE2  
210 and PAGAN2 were less accurate than TIPars.

211

212 For the successive100 and successive1000 datasets, TIPars resulting trees had a significantly  
213 larger RF distance than those of UShER (Fig. 3C). However, the log-likelihood of the TIPars

214 resulting trees was significantly higher than that of UShER (Fig. 3D; fig. S2, C and D). By  
215 comparing the trees generated from TIPars and UShER (Fig. 2B), the difference is that TIPars  
216 inserted some of query taxa (green lines in Fig. 2B; successive taxa pruned from the reference  
217 tree) into two subtrees where one of them (the one containing over half the queries) had the same  
218 topology as the one in the reference tree. Whereas UShER inserted those queries mostly within a  
219 monophyletic clade but it was different from the reference tree. As a result, UShER retained the  
220 local topology (better RF distance) (Lin et al., 2012; Smith, 2021) but missed the global topology  
221 (worse log-likelihood). Through a RF distance comparison specifically to each query taxon  
222 instead of all query taxa, we found that the RF distance resulted from UShER was not  
223 significantly higher than that of TIPars (table S4).

224

225 On the other hand, we may suppose that in the situation of random100 and random1000 tests, RF  
226 distance would be a suitable metric for comparing the performance of taxa insertions as they are  
227 similar to the case of single taxon placements, where most removed taxa are within different  
228 monophyletic clades due to randomness (Bryant & Steel, 2009).

229

230 To make the log-likelihood of the resulting trees comparable, we applied FastTree2 to reoptimize  
231 the branch lengths with fixed topology (Price et al., 2010). However, compared to the efficiency  
232 of taxa insertion (Table 1), the re-optimization is time-consuming. For example, the optimization  
233 for a SARS2-100k tree took 10 to 12 hours and required around 125 GB memory (table S5).

234 Therefore, we also computed the log-likelihoods with fixed branch lengths (FLL) using IQ-  
235 TREE2, and TIPars still outperformed UShER significantly (fig. S4) by achieving a higher log-  
236 likelihood in the resulting tree output directly from the program.

237

238 **Inserting novel sequences**

239 To verify practicability of TIPars in adding novel sequences into a given phylogeny, we further  
240 performed an experiment to insert novel real-world SARS-CoV-2 samples into the SARS2-100k  
241 reference tree. We randomly selected SARS-CoV-2 samples from GISAID which were not  
242 included in the SARS2-100k dataset. Twenty sets of 100, 1000, 5000 and 10000 genome  
243 sequences were generated as the queries for taxa insertion using TIPars and UShER.

244

245 Log-likelihoods of the resulting trees from each program were calculated and their pairwise  
246 differences between TIPars and UShER were used to evaluate the performance. RF distance was  
247 not a suitable metric in this experiment as a comparable reference tree was not available. TIPars  
248 provided a resulting tree with a significantly better log-likelihood than UShER in all situations (p-  
249 values <0.05; Fig. 4A).

250

251 In addition to tree log-likelihood, we also compared the PANGO lineages (PANGOLins)  
252 assignment of the added samples (Rambaut et al., 2020) to validate the accuracy. Only  
253 PANGOLins that existed in the reference tree were considered. We assigned each newly inserted  
254 sequence with the lineage name of the subtree under the parental node of the inserted position.  
255 The subtree was annotated by its descendant reference taxa if all of them were monophyletic  
256 (McBroome et al., 2021). A true positive was defined as when the assigned lineage of a query  
257 sequence was identical to its original PANGOLins label. In case of queries within unannotated  
258 subtrees, we ignored them in the calculation. TIPars outperformed UShER by achieving higher  
259 true positive samples on the 100, 1000, 5000 and 10000 insertion datasets with an average of 92%  
260 PANGOLins accuracy. The superiority of TIPars was statistically significant under a right-tailed  
261 paired t-test (p-values < 0.001) on the 1000, 5000 and 10000 datasets (Fig. 4B and table S6).

262

263 **Discussion**

264 TIPars showed promising taxa placement and insertion accuracy in the phylogenies with  
265 homogenous (H3N2 and SARS2-100k) and divergent (16S and NDV) sequences, and in  
266 extremely large phylogeny (SARS2-660k) with reasonable runtime and memory usage. Although  
267 UShER has a lower accuracy in the divergent sequence datasets (16S and NDV), it ran faster than  
268 TIPars (Table 1).

269  
270 Reconstruction of ancestral sequences are associated with all taxa across the phylogenetic tree,  
271 which could be done using maximum likelihood statistical models or other advanced techniques  
272 (Ishikawa et al., 2019; Kosakovsky Pond et al., 2020; Pupko, Pe'er, Shamir, & Graur, 2000; Y.  
273 Yu et al., 2020). So ancestral sequences may reveal more accurate (especially intermediate)  
274 evolutionary information than the consensus mutation lists along each individual lineage as  
275 UShER does. The evolutionary information can be used to distinguish insertion, deletion and  
276 substitution events in the searching of taxon placement (Löytynoja & Goldman, 2005), which  
277 may help TIPars to be robust on more divergent phylogenies (Löytynoja et al., 2012). Overall,  
278 compared to existing phylogenetic placement programs, TIPars is a robust method for a variety of  
279 datasets with densely sampled and highly similar sequences of a single species which are  
280 common in tracking pathogen epidemiology and transmission, as well as the sequences with  
281 greater intraspecific divergence such as the genome datasets at genus, families or higher  
282 taxonomic levels for systematics studies.

283  
284 Although we showed that TIPars resulting trees with higher tree log-likelihood compared to other  
285 programs, a general limitation of the phylogenetic placement method is that errors from incorrect  
286 placements accumulate as multiple sequences are inserted sequentially. In order to minimize the  
287 error due to large numbers of sequence insertions, it is suggested to conduct tree refinements on  
288 not only branch length but also tree topology using different techniques such as nearest-neighbor

289 interchanges (NNIs) and subtree-pruning-regrafting (SPRs) (Price et al., 2010). Furthermore,  
290 starting such optimization process with an initial tree of higher log-likelihood may achieve a final  
291 tree with better log-likelihood using certain of time (Price et al., 2010). As demonstrated in table  
292 S7, for the resulting trees of equal RF distance from both TIPars and UShER (n=28), the branch  
293 length optimized trees for TIPars had higher (n=14) or equal (n=12) tree log-likelihoods than the  
294 ones resulted from UShER.

295  
296 TIPars could facilitate the future development of sequence analysis methods that make use of the  
297 phylogenetic placement information. For instance, genome assembly of NGS read data from the  
298 metagenome can use phylogenetic positions of the short-read sequences to distinguish between  
299 related microbial strains or lineages. With the aid of TIPars, NGS sequences could be inserted to  
300 the branches of specific strains or lineages in a reference phylogeny. This can be used in  
301 calculating the proportion of strains in mixed infection even when one of the strains is at low  
302 abundance in which *de novo* assembly may generate incomplete contigs.

303  
304 Since the start of the COVID-19 pandemic, over 5 million SARS-CoV-2 genome sequences have  
305 been made publicly available (Shu & McCauley, 2017). With the reduction in cost, the rate of  
306 genome sequencing is expected to skyrocket in the future. By providing rapid and memory  
307 efficient taxa insertions at high accuracies, TIPars may improve real-time tracing and monitoring  
308 of SARS-CoV-2 transmission through the large-scale global phylogenetic analysis of the ever-  
309 increasing SARS-CoV-2 genome sequences.

310

## 311 **Materials and Methods**

312

### 313 **Implementation of TIPars**

314 After assigning the ancestral sequences at every internal node and taxa sequences at external  
315 nodes, TIPars inserts a set of new samples into the reference phylogenetic tree sequentially based  
316 on parsimony criteria.

317  
318 For a query sequence Q, TIPars computes the minimal substitution score against every branch in  
319 the tree. While inserting query Q into to the branch A-B (parent node - child node) at a potential  
320 newly added node P (Fig. 1A), the minimal substitution score is the sum of substitution scores  
321 that sequence Q differs from both sequence A and sequence B based on a specific substitution  
322 scoring table based on the IUPAC nucleotide ambiguity codes (table S3). The single branch with  
323 the minimum substitution score  $\sigma$  is reported as the best placement.

324  
325 However, in terms of multiple placements where more than one branch have the same minimum  
326 substitution score, TIPars applies simple but practical rules to filter them to a single best  
327 placement such that multiple queries would be inserted sequentially based on one resulting tree.  
328 The first priority is to select the branch with node A containing the most numbers of child nodes.  
329 The second priority is to select the branch with node A of the lowest node height, that is the total  
330 branch length on the longest path from the node to a leaf (Suchard et al., 2018). Finally, in the  
331 case where the ambiguity cannot be resolved by the first two priorities, TIPars just turns to a pick  
332 up randomly. Even though TIPars will filter out multiple placements, these potential placements  
333 will also be printed out for user notice.

334  
335 We proposed a local estimation model to calculate the pendant length of the newly introduced  
336 branch P-Q ( $l_{P-Q}$ ) which is considering the branch lengths of the local triplet subtree (A,(B,Q))  
337 (Fig. 1A). Pendant length is defined as  $l_{P-Q} = \sigma / (\delta_A + \delta_B) * l_{A-B}$ , where  $\delta_A$  and  $\delta_B$  are the unique  
338 mismatch substitution scores of Q to A and B, and  $l_{A-B}$  is the original length of branch A-B. The

339 location of P on branch A-B is determined by the ration of  $\delta_A$  and  $\delta_B$ , i.e., Distal length:  
340  $l_{A-P} = \delta_A / (\delta_A + \delta_B) * l_{A-B}$ , and Sibling length:  $l_{B-P} = \delta_B / (\delta_A + \delta_B) * l_{A-B}$ . The ancestral sequence  
341 of node P is estimated by majority vote of the nucleotide bases of sequence A, B and Q. To retain  
342 the topology of reference tree, a potential nucleotide base of Q will be only derived from A or B.  
343 For a special case of  $l_{A-B}$  is zero but  $\sigma$  is not, TIPars will consider upper branch of A's parent to  
344 A for scaling.

345  
346 We implemented TIPars using Java with BEAST library (Suchard et al., 2018). Both FASTA and  
347 VCF formats are acceptable for loading sequences while NEWICK format is for the tree file.  
348 FASTA file is the default setting, but VCF file is more memory efficient for large dataset of high  
349 similar sequences, e.g. SARS-CoV-2 virus. To convert a FASTA file to VCF file with all  
350 sequence mutations, i.e. insertion, deletion and substitution, we used a Python package  
351 PoMo/FastaToVCF.py (Schrempf, Minh, De Maio, von Haeseler, & Kosiol, 2016).

### 352 353 **Benchmark datasets preparation**

354  
355 Unmasked SARS-CoV-2 MSA from GISAID was downloaded on 6th July 2021. Then all SARS-  
356 CoV-2 viral genome sequences collected before 1st January 2021 were extracted from the MSA.  
357 In order to ensure the sequences used for downstream analysis were complete, SARS-CoV-2  
358 genomes with sequence length  $< 29,000$  bp and  $> 0.5\%$  Ns were removed (namely  
359 GISAID202101). To ensure that the global phylogenetic diversity is well represented in the sub-  
360 sampled dataset, sequences from all lineages as designated by the PANGO nomenclature system  
361 (Rambaut et al., 2020) were sub-sampled. Where fewer than 50 sequences of a given lineage were  
362 found in the global dataset, all sequences of the lineage were included. This resulted in a final  
363 sub-sampled dataset of 96,020 sequences from 1,249 PANGO lineages, with hCoV-

364 19/Wuhan/WIV04/2019/EPI\_ISL\_402124 included as the reference genome (namely SARS2-  
365 100k). The SARS2-100k reference tree was then built using IQ-TREE2 with GTR model using  
366 the EPI\_ISL\_402124 as root. Ancestral sequences of each internal node were estimated using  
367 PastML with the MSA and the IQ-TREE2 generated tree as input.

368  
369 Three small but representative nucleotide sequence datasets namely, bacterial 16S rRNA (16S),  
370 hemagglutinin genes of human seasonal influenza A viruses (H3N2), and Newcastle disease virus  
371 genomes (NDV), were prepared for programs performance comparison. The 16S dataset was  
372 downloaded from Genomes OnLine Database (Mukherjee et al., 2019) and randomly down-  
373 sampled to 800 sequences. HA sequences of 800 H3N2 viruses were randomly extracted from  
374 Influenza Research Database (Zhang et al., 2017). The 235 NDV sequences were downloaded  
375 from GenBank. Alignments were constructed using MUSCLE (Edgar, 2004). Reference trees of  
376 these datasets were built using RAxML (Stamatakis, 2014) standard hill-climbing heuristic search  
377 with 100 multiple inferences and GTRGAMMA model. Ancestral sequences were estimated  
378 using ML joint method (Pupko et al., 2000).

### 379 380 **Novel SARS-CoV-2 query sequence dataset**

381  
382 To generate novel query sequences for the 20 sets of 100, 1000, 5000 and 10000 sequences,  
383 SARS-CoV-2 genomes that were not included in the SARS2-100k dataset were randomly  
384 selected from the GISAID202101 dataset. Selected sequences were then aligned to the SARS2-  
385 100k sequences alignment by opening necessary gaps to obtain the full-length MSA. The newly  
386 selected sequences were extracted to obtain the final query sample sets. Corresponding new gaps  
387 were also added back to the ancestral sequence alignment for each dataset generated. PANGO



388 lineages data for the novel SARS-CoV-2 query sequences and the taxa of reference tree was  
389 downloaded from GISAID on 6th July 2021.

390

### 391 **Benchmark programs**

392

393 We compared TIPars to four state-of-the-art phylogenetic placement tools, namely UShER, EPA-  
394 ng, IQ-TREE2 and PAGAN2 while EPA-ng only works for single taxon placement and IQ-  
395 TREE2 and PAGAN2 were only used for multiple taxa insertion.

396

397 For the SARS2-100k dataset, only TIPars and UShER were considered as the other programs  
398 were not able to complete the computation within a reasonable runtime (Table 1). For the three  
399 smaller datasets, we compared all of them comprehensively. Details of the commands used for  
400 different programs could be found in table S8.

401

402 TIPars, UShER and EPA-ng would report multiple placements for single taxon insertion. The  
403 marked best placements of TIPars and UShER by themselves were used for our accurac  
404 evaluation. EPA-ng reports its results sorted by log-likelihood, so the placement with the highest  
405 log-likelihood was applied for assessment.

406

407 For any tools that accept only binary tree, i.e., EPA-ng and PAGAN2, we first converted the  
408 original polytomous tree to a binary tree using the Ape R package (Paradis & Schliep, 2019).

409

410 When adding unaligned query samples, it is suggested to align them to the MSA of taxa and  
411 ancestral sequences in the reference tree using MAFFT ('--add' option) (Kato & Standley,  
412 2013).

## 413 **Evaluation metrics**

414

415 For single taxon placement evaluation, we first pruned one taxon from the reference tree and re-  
416 inserted it back. To assess the consistency between placement algorithms and the typical tree-  
417 constructing approach, we proposed using Robinson–Foulds (RF) Distance as a measure of the  
418 tree topology accuracy, as calculated by TreeCmp (Bogdanowicz, Giaro, & Wróbel, 2012). When  
419 the RF distance between a hypothetical tree and the reference tree is zero, the topology of the  
420 hypothetical tree is the same as the reference tree which means the algorithm inserts the query  
421 sample into the reference tree topological correctly. Another performance comparison with  
422 different true positive definition was conducted for binary trees derived from trees with polytomy  
423 using the measurement of whether sister node sets are identical to reference (Y. Turakhia et al.,  
424 2020).

425

426 For multiple taxa insertion evaluation, we randomly pruned a set of taxa from the reference tree  
427 and re-inserted them back. In addition to using RF distance to compare the hypothetical tree  
428 against the reference tree, we also calculated the log-likelihood of the hypothetical tree as a  
429 measurement of the accuracy of the taxa insertions. We applied two methods to compute log-  
430 likelihoods including FastTree2 (double-precision version) (Gamma20 Log-Likelihood) (Price et  
431 al., 2010) for optimized branch length, and IQ-TREE2 (Log-Likelihood (Fixed Br)) for fixed  
432 branch length.

433

434 EPA-ng outputs the placement information (placed branch, distal length, and pendant length) for a  
435 query without the construction of the final tree. In order to compute the RF distance, we assisted  
436 EPA-ng in inserting the query into the reference tree to generate the hypothetical tree.

437

438 IQ-TREE2 and PAGAN2 support initial tree, but they are not exactly based on the input tree  
439 topology for construction, so RF distance to original reference tree is not suitable for them.  
440 Note that UShER outputs the final constructed tree using the number of mutations as branch  
441 length (otherwise no branch length would be specified at branches modified), so we modified its  
442 branch length as number of mutations divided by alignment length in calculation of log-likelihood  
443 with fixed branch length model.

444

## 445 **Statistics**

446

447 99% t-test confident intervals and 99% paired t-test p-value (right tail) for the results of TIPars  
448 against other programs were computed by Matlab R2013b. All violin graphs were generated by R  
449 4.1.1 using the package *ggstatsplot* (Patil, 2021). Illustration and annotation of phylogenetic trees  
450 were done using the R package *ggtree* (G. Yu, Smith, Zhu, Guan, & Lam, 2017).

451

## 452 **Data and materials availability**

453

454 SARS2-CoV-2 data used in this work were all downloaded from GISAID  
455 (<https://www.gisaid.org/>). TIPars is available at <https://github.com/id-bioinfo/TIPars>.

456

## 457 **Acknowledgments**

458

459 We gratefully acknowledge the following Authors from the Originating laboratories responsible  
460 for obtaining the specimens and the Submitting laboratories where genetic sequence data were  
461 generated and shared via GISAID Initiative, on which this research is based. A full  
462 acknowledgement table can be found with two EPI\_SET-IDs, i.e., EPI\_SET\_20211201vz and

463 EPI\_SET\_20211206tc, in Data Acknowledgement Locator under GISAID resources

464 (<https://www.gisaid.org/>).

465

466 This project is supported by the Hong Kong Research Grants Council's General Research Fund

467 (17150816), the National Natural Science Foundation of China's Excellent Young Scientists Fund

468 (Hong Kong and Macau) (31922087), the Health and Medical Research Fund (COVID1903011-

469 WP1), the Innovation and Technology Commission's InnoHK funding (D<sup>2</sup>4H), and the

470 Guangdong Government for the funding supports (2019B121205009, HZQB-KCZYZ-2021014,

471 200109155890863, 190830095586328 and 190824215544727).

472

### 473 **Competing interests**

474

475 Authors declare that they have no competing interests.

476

### 477 **References**

478

479 Barbera, P., Kozlov, A. M., Czech, L., Morel, B., Darriba, D., Flouri, T., & Stamatakis, A.

480 (2019). EPA-ng: Massively Parallel Evolutionary Placement of Genetic Sequences. *Syst*  
481 *Biol*, 68(2), 365-369. doi:10.1093/sysbio/syy054

482 Bogdanowicz, D., Giaro, K., & Wróbel, B. (2012). TreeCmp: Comparison of Trees in Polynomial  
483 Time. *Evolutionary Bioinformatics Online*, 8, 475-487. doi:10.4137/EBO.S9657

484 Bryant, D., & Steel, M. A. (2009). Computing the Distribution of a Tree Metric. *IEEE ACM*  
485 *Trans. Comput. Biol. Bioinform.*, 6, 420-426.

486 Edgar, R. C. (2004). MUSCLE: a multiple sequence alignment method with reduced time and  
487 space complexity. *BMC Bioinformatics*, 5, 113. doi:10.1186/1471-2105-5-113

488 Filipski, A., Tamura, K., Billing-Ross, P., Murillo, O., & Kumar, S. (2015). Phylogenetic  
489 placement of metagenomic reads using the minimum evolution principle. *BMC Genomics*,  
490 16(1), S13. doi:10.1186/1471-2164-16-S1-S13

491 Ishikawa, S. A., Zhukova, A., Iwasaki, W., & Gascuel, O. (2019). A Fast Likelihood Method to  
492 Reconstruct and Visualize Ancestral Scenarios. *Molecular Biology and Evolution*, 36(9),  
493 2069-2085. doi:10.1093/molbev/msz131

494 Katoh, K., & Standley, D. M. (2013). MAFFT Multiple Sequence Alignment Software Version 7:  
495 Improvements in Performance and Usability. *Molecular Biology and Evolution*, 30(4),  
496 772-780. doi:10.1093/molbev/mst010

- 497 Kosakovsky Pond, S. L., Poon, A. F. Y., Velazquez, R., Weaver, S., Hepler, N. L., Murrell,  
498 B., . . . Muse, S. V. (2020). HyPhy 2.5—A Customizable Platform for Evolutionary  
499 Hypothesis Testing Using Phylogenies. *Molecular Biology and Evolution*, 37(1), 295-299.  
500 doi:10.1093/molbev/msz197
- 501 Lin, Y., Rajan, V., & Moret, B. M. E. (2012). A Metric for Phylogenetic Trees Based on  
502 Matching. *IEEE/ACM Transactions on Computational Biology and Bioinformatics*, 9(4),  
503 1014-1022. doi:10.1109/TCBB.2011.157
- 504 Löytynoja, A., & Goldman, N. (2005). An algorithm for progressive multiple alignment of  
505 sequences with insertions. *Proceedings of the National Academy of Sciences of the United  
506 States of America*, 102(30), 10557. doi:10.1073/pnas.0409137102
- 507 Loytynoja, A., Vilella, A. J., & Goldman, N. (2012). Accurate extension of multiple sequence  
508 alignments using a phylogeny-aware graph algorithm. *Bioinformatics*, 28(13), 1684-1691.  
509 doi:10.1093/bioinformatics/bts198
- 510 Matsen, F. A., Kodner, R. B., & Armbrust, E. V. (2010). pplacer: linear time maximum-  
511 likelihood and Bayesian phylogenetic placement of sequences onto a fixed reference tree.  
512 *BMC Bioinformatics*, 11(1), 538. doi:10.1186/1471-2105-11-538
- 513 McBroome, J., Thornlow, B., Hinrichs, A. S., Kramer, A., De Maio, N., Goldman, N., . . .  
514 Turakhia, Y. (2021). A Daily-Updated Database and Tools for Comprehensive SARS-  
515 CoV-2 Mutation-Annotated Trees. *Molecular Biology and Evolution*.  
516 doi:10.1093/molbev/msab264
- 517 Minh, B. Q., Schmidt, H. A., Chernomor, O., Schrempf, D., Woodhams, M. D., von Haeseler, A.,  
518 & Lanfear, R. (2020). IQ-TREE 2: New Models and Efficient Methods for Phylogenetic  
519 Inference in the Genomic Era. *Mol Biol Evol*, 37(5), 1530-1534.  
520 doi:10.1093/molbev/msaa015
- 521 Moon, J., & Eulenstein, O. (2019, 2019//). *The Cluster Affinity Distance for Phylogenies*. Paper  
522 presented at the Bioinformatics Research and Applications, Cham.
- 523 Mukherjee, S., Stamatis, D., Bertsch, J., Ovchinnikova, G., Katta, H. Y., Mojica, A., . . . Reddy,  
524 T. (2019). Genomes OnLine database (GOLD) v.7: updates and new features. *Nucleic  
525 Acids Res*, 47(D1), D649-D659. doi:10.1093/nar/gky977
- 526 Paradis, E., & Schliep, K. (2019). ape 5.0: an environment for modern phylogenetics and  
527 evolutionary analyses in R. *Bioinformatics*, 35(3), 526-528.  
528 doi:10.1093/bioinformatics/bty633
- 529 Patil, I. (2021). Visualizations with statistical details: The 'ggstatsplot' approach. *PsyArXiv*.  
530 doi:10.21105/joss.03167
- 531 Price, M. N., Dehal, P. S., & Arkin, A. P. (2010). FastTree 2--approximately maximum-likelihood  
532 trees for large alignments. *PLoS One*, 5(3), e9490. doi:10.1371/journal.pone.0009490
- 533 Pupko, T., Pe'er, I., Shamir, R., & Graur, D. (2000). A fast algorithm for joint reconstruction of  
534 ancestral amino acid sequences. *Mol Biol Evol*, 17(6), 890-896.  
535 doi:10.1093/oxfordjournals.molbev.a026369
- 536 Rambaut, A., Holmes, E. C., O'Toole, Á., Hill, V., McCrone, J. T., Ruis, C., . . . Pybus, O. G.  
537 (2020). A dynamic nomenclature proposal for SARS-CoV-2 lineages to assist genomic  
538 epidemiology. *Nature Microbiology*, 5(11), 1403-1407. doi:10.1038/s41564-020-0770-5
- 539 Robinson, D. F., & Foulds, L. R. (1981). Comparison of phylogenetic trees. *Mathematical  
540 Biosciences*, 53(1), 131-147. doi:[https://doi.org/10.1016/0025-5564\(81\)90043-2](https://doi.org/10.1016/0025-5564(81)90043-2)
- 541 Schrempf, D., Minh, B. Q., De Maio, N., von Haeseler, A., & Kosiol, C. (2016). Reversible  
542 polymorphism-aware phylogenetic models and their application to tree inference. *J Theor  
543 Biol*, 407, 362-370. doi:10.1016/j.jtbi.2016.07.042
- 544 Shu, Y., & McCauley, J. (2017). GISAID: Global initiative on sharing all influenza data - from  
545 vision to reality. *Euro surveillance : bulletin Europeen sur les maladies transmissibles =*

- 546 *European communicable disease bulletin*, 22(13), 30494. doi:10.2807/1560-  
547 7917.ES.2017.22.13.30494
- 548 Smith, M. R. (2021). Information theoretic generalized Robinson–Foulds metrics for comparing  
549 phylogenetic trees. *Bioinformatics*, 37(14), 2077–2078.  
550 doi:10.1093/bioinformatics/btab200
- 551 Stamatakis, A. (2014). RAxML version 8: a tool for phylogenetic analysis and post-analysis of  
552 large phylogenies. *Bioinformatics*, 30(9), 1312–1313. doi:10.1093/bioinformatics/btu033
- 553 Suchard, M. A., Lemey, P., Baele, G., Ayres, D. L., Drummond, A. J., & Rambaut, A. (2018).  
554 Bayesian phylogenetic and phylodynamic data integration using BEAST 1.10. *Virus*  
555 *evolution*, 4(1), vey016. doi:10.1093/ve/vey016. (Accession No. 29942656)
- 556 Turakhia, Y., Thornlow, B., Hinrichs, A. S., De Maio, N., Gozashti, L., Lanfear, R., . . . Corbett-  
557 Detig, R. (2020). Ultrafast Sample Placement on Existing Trees (USHER) Empowers  
558 Real-Time Phylogenetics for the SARS-CoV-2 Pandemic. *bioRxiv*.  
559 doi:10.1101/2020.09.26.314971
- 560 Turakhia, Y., Thornlow, B., Hinrichs, A. S., De Maio, N., Gozashti, L., Lanfear, R., . . . Corbett-  
561 Detig, R. (2021). Ultrafast Sample placement on Existing tRees (USHER) enables real-  
562 time phylogenetics for the SARS-CoV-2 pandemic. *Nature Genetics*, 53(6), 809–816.  
563 doi:10.1038/s41588-021-00862-7
- 564 Yu, G., Smith, D. K., Zhu, H., Guan, Y., & Lam, T. T.-Y. (2017). ggtree: an r package for  
565 visualization and annotation of phylogenetic trees with their covariates and other  
566 associated data. *Methods in Ecology and Evolution*, 8(1), 28–36.  
567 doi:<https://doi.org/10.1111/2041-210X.12628>
- 568 Yu, Y., Blair, C., & He, X. (2020). RASP 4: Ancestral State Reconstruction Tool for Multiple  
569 Genes and Characters. *Molecular Biology and Evolution*, 37(2), 604–606.  
570 doi:10.1093/molbev/msz257
- 571 Zhang, Y., Aevermann, B. D., Anderson, T. K., Burke, D. F., Dauphin, G., Gu, Z., . . .  
572 Scheuermann, R. H. (2017). Influenza Research Database: An integrated bioinformatics  
573 resource for influenza virus research. *Nucleic Acids Res*, 45(D1), D466–D474.  
574 doi:10.1093/nar/gkw857  
575

576 **Figures and Tables**

577

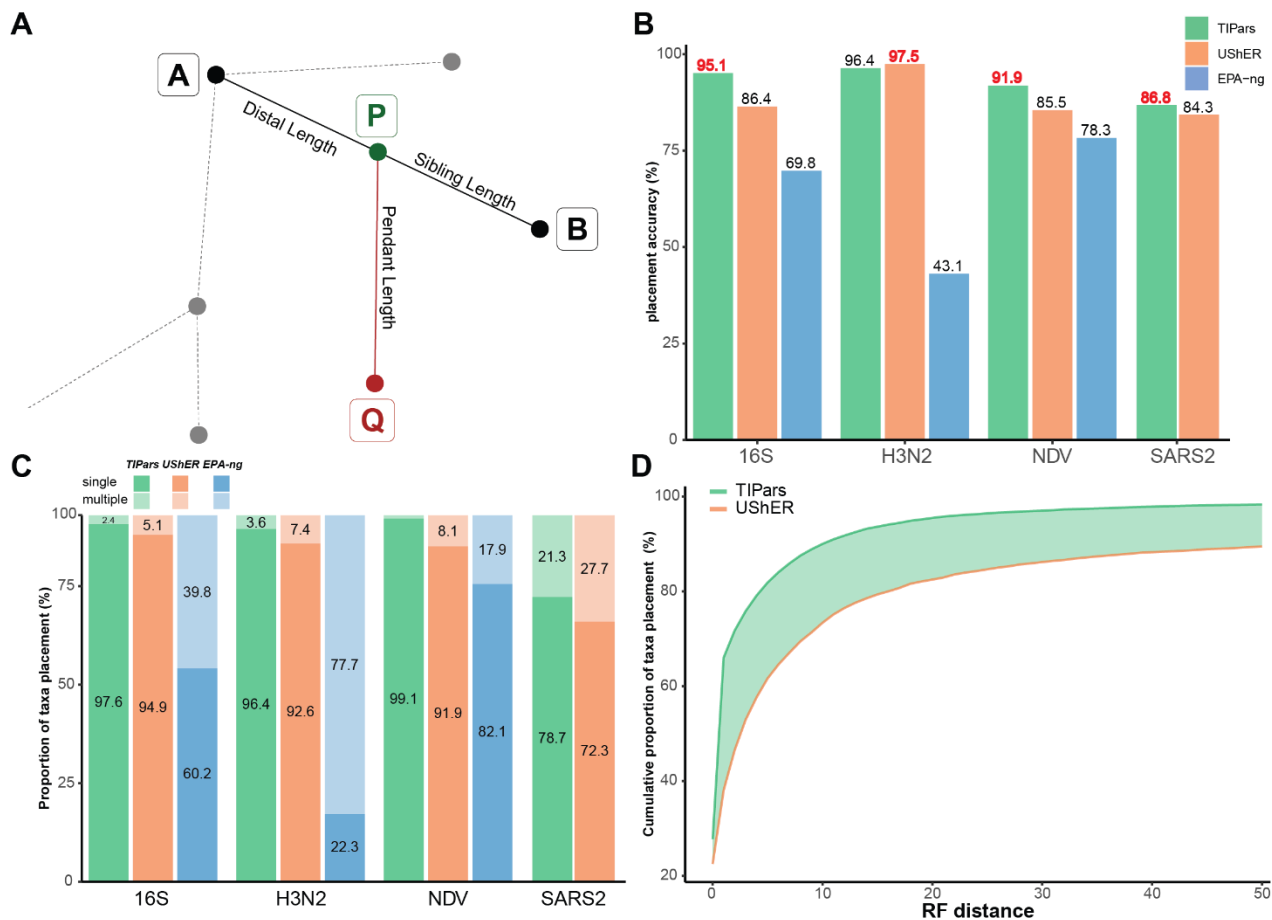

578

579

580 **Fig. 1. Illustration of phylogenetic placement and single taxon placement performance. (A)**

581 Illustration of the placement for a query sequence. “Q” indicates the query sequence, “A” and “B”

582 represent the existing nodes in the reference tree. “P” represents the parental node of “Q”

583 generated by TIPars. Minimum substitution score is calculated based on the triplet formed by A-

584 B-Q. **(B)** Bar charts represent the accuracy of single taxon placement on 16S, H3N2, NDV and

585 SARS2-100k datasets using TIPars, UShER and EPA-ng respectively. Accuracy is indicated on

586 top of each bar and the highest accuracy in each dataset is highlighted in red. **(C)** Stacked bar

587 charts show the proportion of single and multiple taxon placement result for TIPars (Green),

588 UShER (Orange) and EPA-ng (Blue) on the 16S, H3N2, NDV and SARS2-100k datasets.

589 Proportion with > 1% is indicated within the bar. **(D)** Cumulative proportion of single taxa

590 placement on the SARS2-660k dataset with different RF distance cutoff. Highlighted area

591 represents the difference between TIPars and UShER.

592



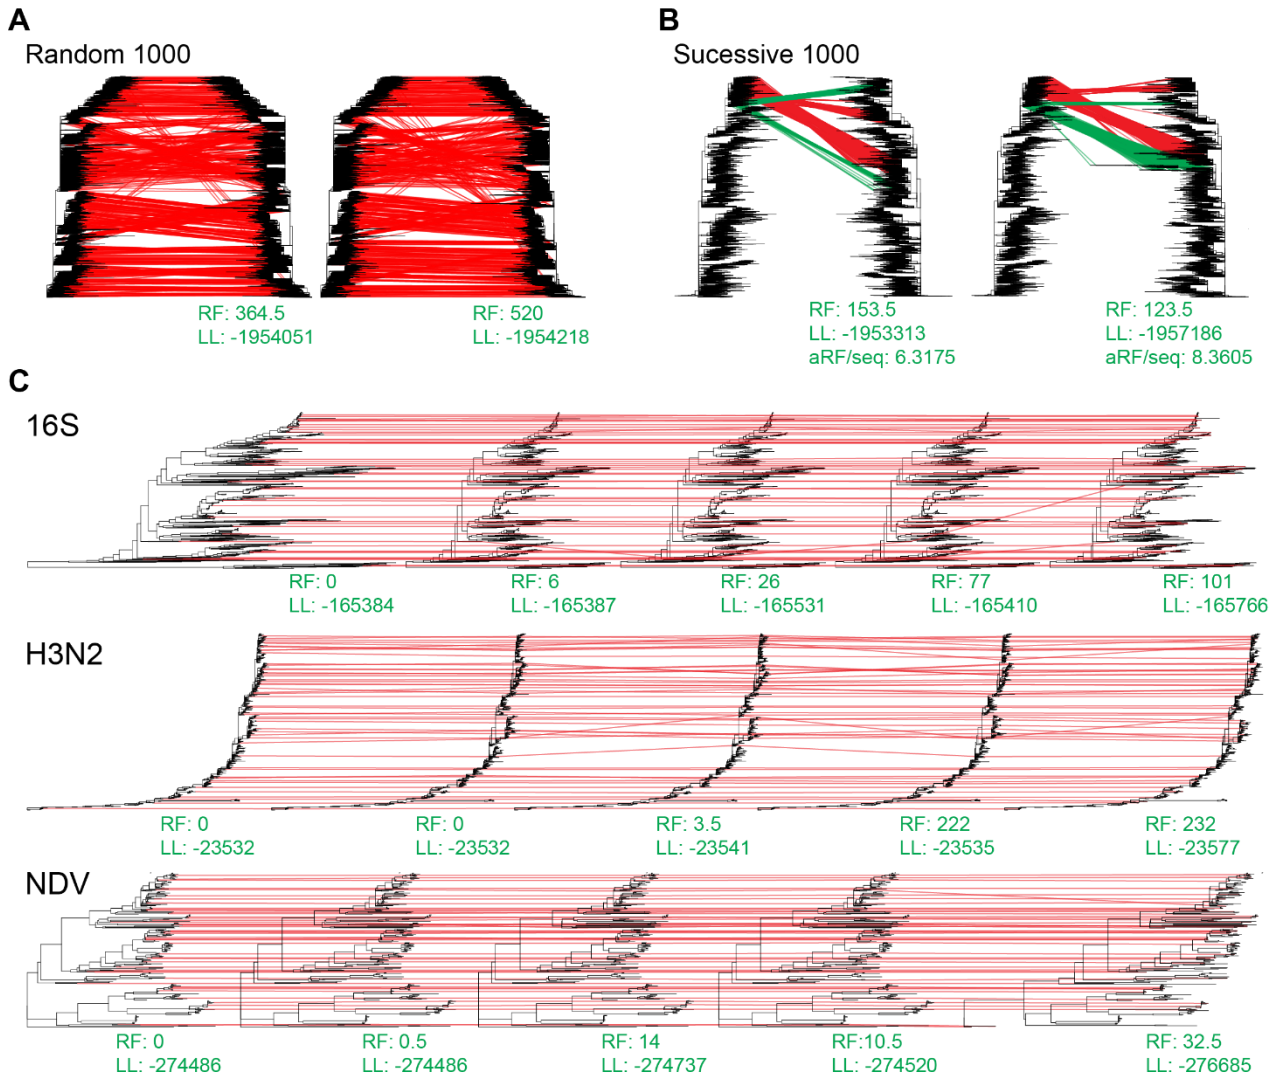

593 **Fig. 2. Taxa insertion visualization.** (A) A demonstration of TIPars resulting tree (Left) and  
594 UShER resulting tree (Right) paired with the reference SARS2-100k reference tree (Left tree in  
595 both figures) for the insertion of randomly selected 1000 taxa sequences. Red lines link the  
596 corresponding positions of inserted taxa between reference and resulting tree. (B) A  
597 demonstration of TIPars resulting tree (Left) and UShER resulting tree (Right) paired with the  
598 reference SARS2-100k reference tree (Left tree in both figures) for the insertion of successively  
599 selected 1000 taxa sequences. Green lines indicate different taxa insertion positions between  
600 TIPars and UShER. Averaged RF-distance per sequence (aRF/seq) comparing to the reference  
601 tree is shown at the bottom. (C) Demonstrations of the resulting trees for randomly selected 50  
602  
603

604 taxa in NDV, 16S (Midpoint rooted) and H3N2 datasets. From the left to the right are trees of  
605 reference, TIPars, UShER, IQ-TREE2 and PAGAN2. RF distance (RF) compared to the reference  
606 tree and the Gamma20 log-likelihood (LL) are shown at the bottom of each resulting tree.

607

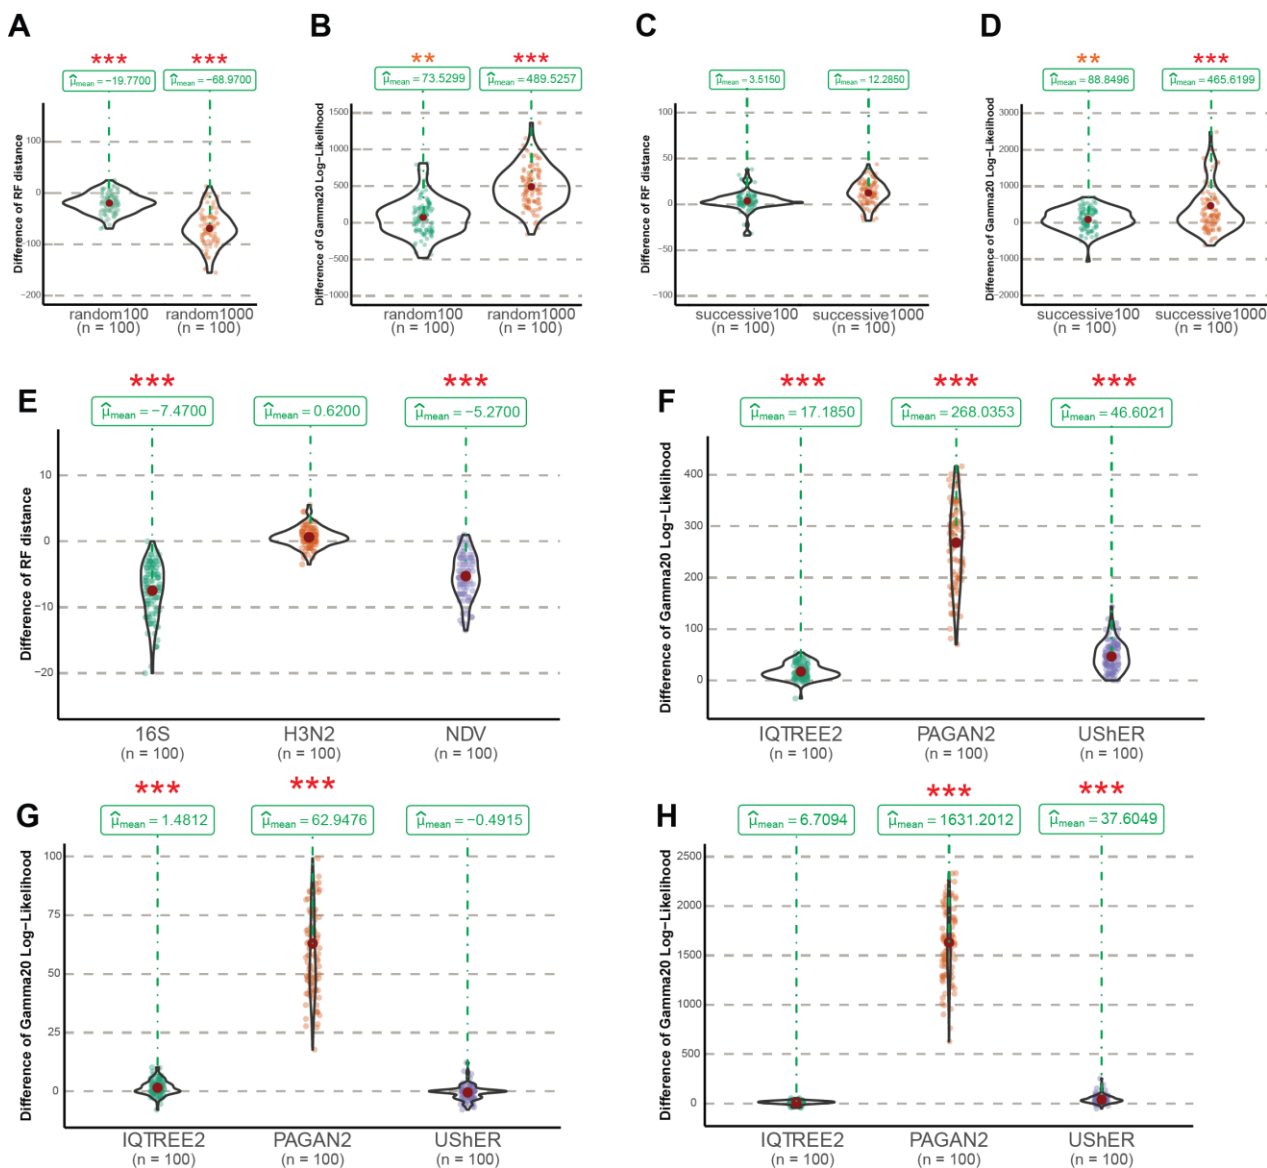

608

609

610

611

612

613

614

615

616

617

**Fig. 3. Multiple sequences insertion performance.** (A-D) Violin graphs show the distribution of paired differences of the RF distance and the Gamma20 log-likelihood between the optimized resulting trees generated by TIPars and UShER (TIPars - UShER) for the random 100, 1000 and successive 100 and 1000 multiple sequences insertions. (E) Distribution of the paired difference of the RF distance between the optimized resulting trees generated by TIPars and UShER (TIPars - UShER) on 16S, H3N2 and NDV random 50 multiple sequences insertions. (F-H) Distribution of the paired difference of the Gamma20 log-likelihood between the optimized resulting trees generated by TIPars and the three other programs (TIPars - Others) on 16S (F), H3N2 (G) and

618 NDV (**H**) random 50 multiple sequences insertions. P-value for the right-sided paired t-test is  
619 indicated by the asterisk on top of each violin diagram, where  $p < 0.05$  is indicated by one pink  
620 asterisk (\*),  $p < 0.01$  by two orange asterisks (\*\*) and  $p < 0.001$  by three red asterisks (\*\*\*)).

621

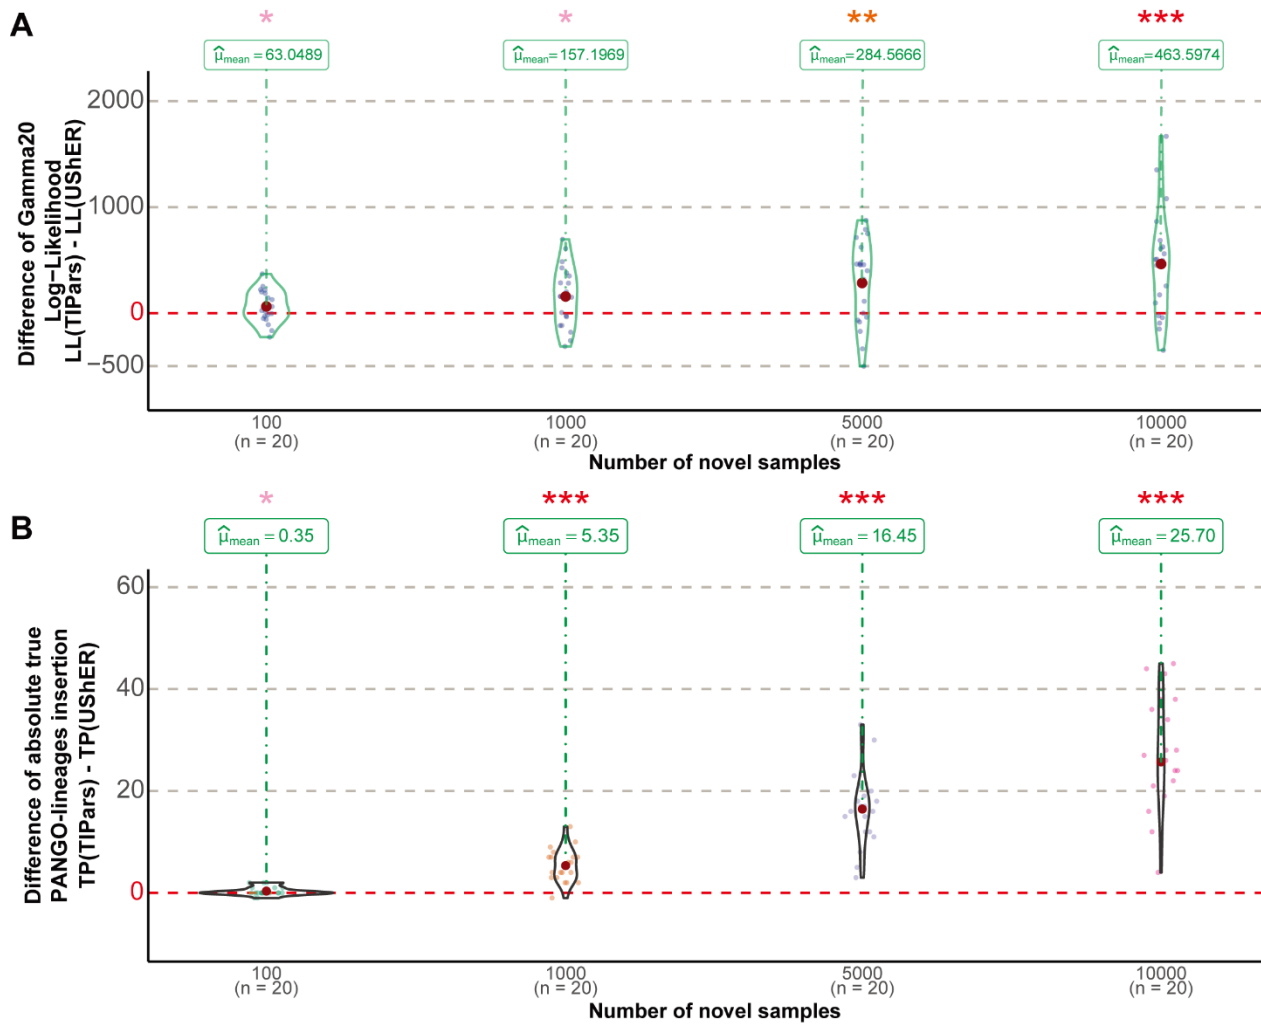

622

623

624 **Fig. 4. Performance of inserting actual novel sequences.** (A, B) Violin graph represents the  
625 distribution of the paired differences between the Gamma20 log-likelihood (LL) (A) and the  
626 absolute number of true PANGO-lineages insertion (TP) (B) of TIPars over USHER. p-value for  
627 the right-sided paired t-test was indicated by the asterisk on top of each violin diagram, where  
628  $p < 0.05$  indicated by one pink asterisk (\*),  $p < 0.01$  by two orange asterisks (\*\*) and  $p < 0.001$  by  
629 three red asterisks (\*\*\*).

630

631 **Table 1. Average running time and memory used through 10 repeated runs of**  
632 **inserting/placing 100 genome samples into SARS2-100k reference tree.** Tests were running on  
633 a server of 64 Intel Xeon Gold 6242 CPU cores and 1500 GB RAM. We also compared TIPars  
634 with UShER on a general computer with 8 CPU cores. TIPars ran with a JAVA setting of  
635 Xmx1G. The running time of UShER contains its necessary computation of ‘mutation-annotated  
636 tree’. PAGAN2 was not runnable for this dataset. N/A indicates that data are not applicable.  
637

| <b>Tools</b>    | <b>CPU cores assigned</b> | <b>Mean insertion time (HH:MM:SS)</b> | <b>Mean running time (HH:MM:SS)</b> | <b>Mean peak memory (GB)</b> |
|-----------------|---------------------------|---------------------------------------|-------------------------------------|------------------------------|
| <b>TIPars</b>   | 64                        | 0:00:21                               | 0:00:52                             | 1.39                         |
| <b>TIPars</b>   | 8                         | 0:00:31                               | 0:01:03                             | 1.18                         |
| <b>UShER</b>    | 64                        | 0:00:02                               | 0:03:14                             | 0.84                         |
| <b>UShER</b>    | 8                         | 0:00:05                               | 0:05:14                             | 0.16                         |
| <b>EPA-ng</b>   | 64                        | 0:04:45                               | 0:10:25                             | 1022.14                      |
| <b>IQ-TREE2</b> | 64                        | N/A                                   | 5:49:10                             | 101.10                       |
| <b>PAGAN2</b>   | 64                        | N/A                                   | N/A                                 | N/A                          |

638

639
